# Supplementary material for: Interaction of ZnO Nanoparticles with Metribuzin in a Soil–Plant System: Ecotoxicological Effects and Changes in the Distribution Pattern of Zn and Metribuzin
Source: MDPI journal article supplement (doi:10.3390/agronomy13082004), 2023-07-28
Supplement: s1 [file s1]

Archive with 3 entries (3 files):
- Supplementary Materials.pdf
- Supplementary Table S1.pdf
- Supplementary Table S2.pdf
