# Supplementary material for: Interaction of ZnO Nanoparticles with Metribuzin in a Soil–Plant System: Ecotoxicological Effects and Changes in the Distribution Pattern of Zn and Metribuzin
Source: MDPI journal article supplement (doi:10.3390/agronomy13082004), 2023-07-28
Supplement: s1 [file s1 › Supplementary Table S1.pdf]

**Supplementary Materials Table S1.** Soil pHw (1:2.5) data measured at the end of the experiment

Data of the soil pHw (1:2.5) in control soil (no added Zn or MTZ) and soils spiked with ZnO NPs, metribuzin (MTZ) and combined ZnO NPs/MTZ at the end of the experiment (23 days). Values are the mean±SD of three replicates of each treatment or control (n=3). Different letters indicate significant differences (LSD test,  $P < 0.05$ ) in each ZnO NPs treatment (0, 20 and 50 mg/kg of Zn). \*, \*\* and \*\*\* indicate significant differences at  $P < 0.05$ ,  $P < 0.01$  and  $P < 0.001$ , respectively.

| ZnO NPs<br>mg/kg DW | MTZ<br>mg/kg DW | pHw (1:2.5)      |
|---------------------|-----------------|------------------|
| 0                   | 0               | 7.14±0.09b *     |
|                     | 2               | 7.40±0.07a       |
|                     | 3               | 7.41±0.07a       |
| 20                  | 0               | 7.04±0.03b' **   |
|                     | 2               | 7.4±0.1a'        |
|                     | 3               | 7.34±0.06a'      |
| 50                  | 0               | 7.11±0.04c'' *** |
|                     | 2               | 7.38±0.07b''     |
|                     | 3               | 7.57±0.08a''     |
