# Supplementary material for: Interaction of ZnO Nanoparticles with Metribuzin in a Soil–Plant System: Ecotoxicological Effects and Changes in the Distribution Pattern of Zn and Metribuzin
Source: MDPI journal article supplement (doi:10.3390/agronomy13082004), 2023-07-28
Supplement: s1 [file s1 › Supplementary Table S2.pdf]

**Supplementary Materials Table S2.** Translocation factor and bioconcentration factor values for MTZ in bean plants

Translocation factor (TF) and bioconcentration factor (BCF) values for MTZ in bean plants grown for 23 days in soils treated with of ZnO NPs, metribuzin (MTZ) and ZnO NPs/MTZ mixtures. Values are the mean±SD of three replicates of each treatment analyzed in triplicate (n=3x3). Different letters indicate significant differences (LSD test, P<0.05) in each MTZ treatment (2 and 3 mg/kg of MTZ). Within each treatment group, columns without letters indicate no significant difference. \* and \*\* indicate significant differences at P<0.05 and P<0.01, respectively.

| MTZ<br>mg/kg DW | ZnO NPs<br>mg/kg DW | TF <sub>stem/root</sub> | TF <sub>leaf/stem</sub> | BCF <sub>root/soil</sub> | BCF <sub>stem/soil</sub> | BCF <sub>leaf/soil</sub> |
|-----------------|---------------------|-------------------------|-------------------------|--------------------------|--------------------------|--------------------------|
| 2               | 0                   | 23±8                    | 7±1b*                   | 0.23±0.1                 | 5 ±1                     | 34±1a*                   |
|                 | 20                  | 17±4                    | 3.35±0.01a              | 0.24±0.05                | 4.2±0.3                  | 14±1b                    |
|                 | 50                  | 22±1                    | 2.93±2a                 | 0.16±0.03                | 3.2±0.7                  | 9±3b                     |
| 3               | 0                   | 15±4                    | 7±1                     | 0.18±0.03a <sup>''</sup> | 2.9±0.5                  | 24±1a <sup>''</sup> *    |
|                 | 20                  | 40±25                   | 6±1                     | 0.09±0.01b'              | 1.95±0.5                 | 13±1b'                   |
|                 | 50                  | 53±12                   | 4±1                     | 0.07±0.06b'              | 4±2                      | 16±4b'                   |
